# Supplementary material for: Characterization of a Novel Fe2+ Activated Non-Blue Laccase from Methylobacterium extorquens
Source: MDPI journal article supplement (doi:10.3390/ijms23179804), 2022-08-29
Supplement: s1 [file s1]

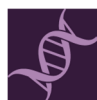

Article

# Characterization of a Novel Fe<sup>2+</sup> Activated Non-Blue Laccase from *Methylobacterium extorquens*

Abidan Ainiwaer, Yue Liang, Xiao Ye, Renjun Gao \*

Key Laboratory for Molecular Enzymology and Engineering, The Ministry of Education, School of Life Science, Jilin University, Changchun 130012, China; abdan18@mails.jlu.edu.cn (A.A.); yue.liang@bofuconsulting.com (L.Y.); yexiao20@mails.jlu.edu.cn (X.Y.)

\* Correspondence: gaorj@jlu.edu.cn; Tel.: +86-431-18604313058; Fax: +86-431-85155200

The gene sequence of Melac13220

ATGCGAAATCCCGACCCGACGCCCCAGCCCGCGCCGGGATCGTTCTCACGGCGCGATCTGCTCGCGGGCA  
GCGCCGCCCTCGCCCTGATGCGCGGACGCGCCGCGGCCAAGCGCCGCGCGGAAGGCCCGCCCTCGGA  
GCCGAAATCGATCAAGGCAGCACCGGCCACGCTCCGCCTGAAGCCCGAGCCCGCGCCTGAGACCGCCGTA  
TGGCGTCTCGGCGAAGCGGAGGACCGATCCTGCGGGTCAAGCTCGGCGAGGCAATCCGCCTGCGCGTCG  
AGAACGGGACCGACAAGCCGCTCTCGCTGCACTGGCACGGGGTGGCGATCGTCAACGCCATGGACGGCGT  
CGGCGGCGTCAACCAGGAGCCGATCAAGCCGGGGGCGAGCTTACCTACGACTTCACGCCCCGGATGCC  
GGCAGCTTCCTGATCCGCGCGCTCGTTGTGCGGGGTCGAGCGAGCCGTCGGGCCGGGGCATCGCCGGCA  
TGCTGATCGTGACGAGCCCTCCCCGCCCCGGTTCGATGCAGACCTCGCCCTGCTCGTGCAGGATTGGCG  
GCTCGACGAGCGCGCGCTGCAACCCTTCGGGCGAGGTCGCCTTCGCCGAGCGGCCGGGCGGCTCGGC  
AGCGTCGTGACGCTCAACGACGACCGATCCCGCTCGCACTCGACGCGCGGCCCGGCGAGCCGTCTGCGCC  
TGCGGCTCGCCAATGCCTGCAACGCGCGCAGCCTGCGCATCCGCTTCGATGGGCTGAAGGCTTATGTCGC  
GGCCGTGGACGGGCGAGCCGACCGACGTTTCGAGCCTCTGAAGGCGACACTCCCCTTCGCGCCGGGCACG  
CGCTACGACCTGCTGCTCGATCTCCCGGCGCAGGCGGGACCGGCCGGCACGATCACCGCGCTGGTCGGGC  
AGGGCCTGCCGCTGGCGACCTGACCGCCGTCGGCGAGCCGGTGGCGCAATCCGGCCGCGCCCAATCGG  
CTCGATCCCCGAGAACAAGCGCCTGCCGGCCGAGATCCGGTTGCAAAGCGCCCTTCGCGCGAACTCGTG  
CTGACGGGCGGCGTGCGGCCGACAAGGCGAAGCCCGGCGCCGAGACGCCCTATTCCGGCGATCCCGCA  
AGATCTGGCAGATCAACGGCGCGAGCGGGACCGCGGGGGCGGCCCCCTGTTCTCGGTCAAGCGCGGCGG  
GGTCGTGGTGCTGTCGATCCGCAACGACACCGGCTTCATCCAGAGCCTGCACCTGCACGGCCACGTCTTC  
CGCCTGCTGCACAGCTCGATGACGGCTGGGAGCCCTACTGGCTCGACACCGTGCAGATCCCGGAAGGCA  
AAAGCGCCAGATTGCCTTCGTCGCGGACAATCCCGCCGCTGGCTGCTCAGCGCGACCGTGCTGGAGCG  
TTTCGATACCGGGCTATGGACGAGTTTCGAGGTGAGTTGA

**Citation:** Ainiwaer, A.; Liang, Y.; Ye, X.; Gao, R. Characterization of a Novel Fe<sup>2+</sup> Activated Non-Blue Laccase from *Methylobacterium extorquens*. *Int. J. Mol. Sci.* **2022**, *23*, 9804. <https://doi.org/10.3390/ijms23179804>

Academic Editors: Zhou Cheng and Guimin Zhang

Received: 26 July 2022

Accepted: 25 August 2022

Published: 29 August 2022

**Publisher's Note:** MDPI stays neutral with regard to jurisdictional claims in published maps and institutional affiliations.

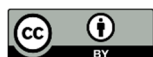

**Copyright:** © 2022 by the authors. Licensee MDPI, Basel, Switzerland. This article is an open access article distributed under the terms and conditions of the Creative Commons Attribution (CC BY) license (<https://creativecommons.org/licenses/by/4.0/>).

The protein sequence of Melac13220

1 MRNPDPTAQP APGSFSRREL FAGSAALALM PRTAAQAQAPA  
 41 GKAPPSEPKS IKAAPATLRL KPEPAPETAV WRLGEAEAPI  
 81 LRVKLGEAIR LRVENGTDKP LSLHWHGVRI VNAMDGVGGV  
 121 TQEPIKPGAS FTYDFTPPDA GSFLIRALVV GGSSEPSGRG  
 161 IAGMLIVDEP SPPPVDADLA LLVQDWRLDE AGALQPFQGV  
 201 AFAAAAGRLG SVVTNLNGRPI PLALDARPGS RLRLRLANAC  
 241 NARSLRIRFD GLKAYVAAVD GQPTDTFEPL KATLPFAPGT  
 281 RYDLLLDLPA QAGPAGTITA LVGQGLPLAT LTAVGEPVAQ  
 321 SGRAAIGSIP ENKRLPAEIR LQSALRRELV LTGGVRPDKA  
 361 KPGAETPYSG DPAKIWQING ASGTAGAAPL FSVKRGGVVV  
 401 LSIRNDTGFI QSLHLHGHVF RLLHQLDDGW EPYWLDTVQI  
 441 PEGKSAQIAF VADNPGRWLL SATVLERFDT GLWTSFEVS

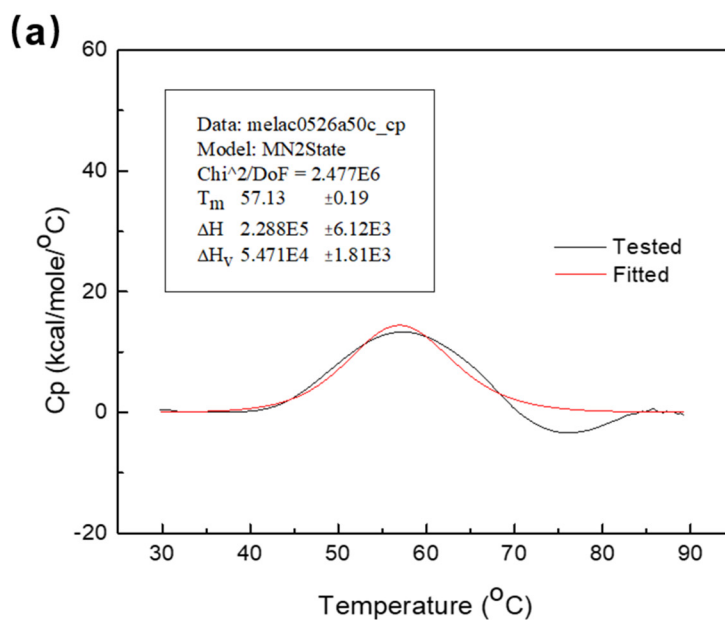

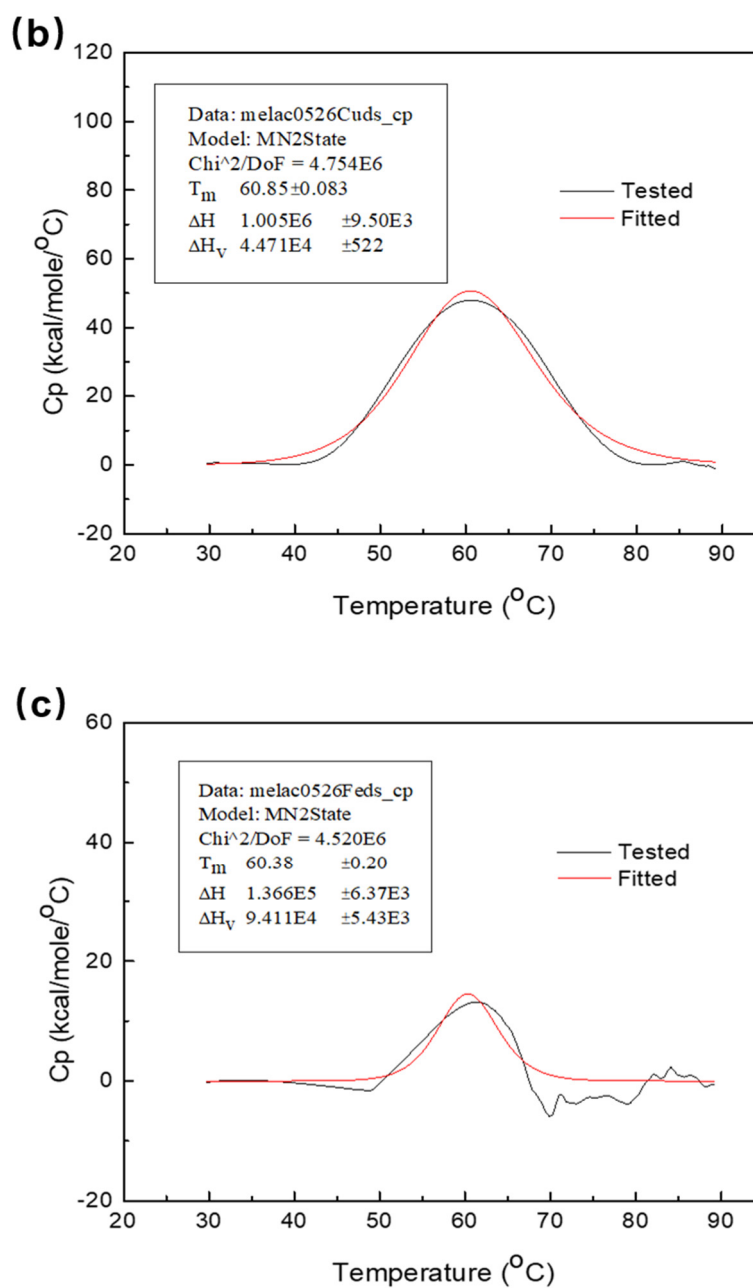

**Figure S1.** The curve of Differential Scanning Calorimetric. The melting temperature ( $T_m$ ) and enthalpy of melting ( $\Delta H_l$ ) of purified Melac13220 **(a)**, after adding  $\text{Cu}^{2+}$  **(b)**, and  $\text{Fe}^{2+}$  **(c)**.
